# Supplementary material for: Development of a novel postoperative adhesion induction model in cynomolgus monkeys with high reliability and reproducibility
Source: Springer Nature journal article supplement (doi:10.1038/s41598-025-88022-3), 2025-02-27
Supplement: MOESM1 [file 41598_2025_88022_MOESM1_ESM.pdf]

## **Supplementary information**

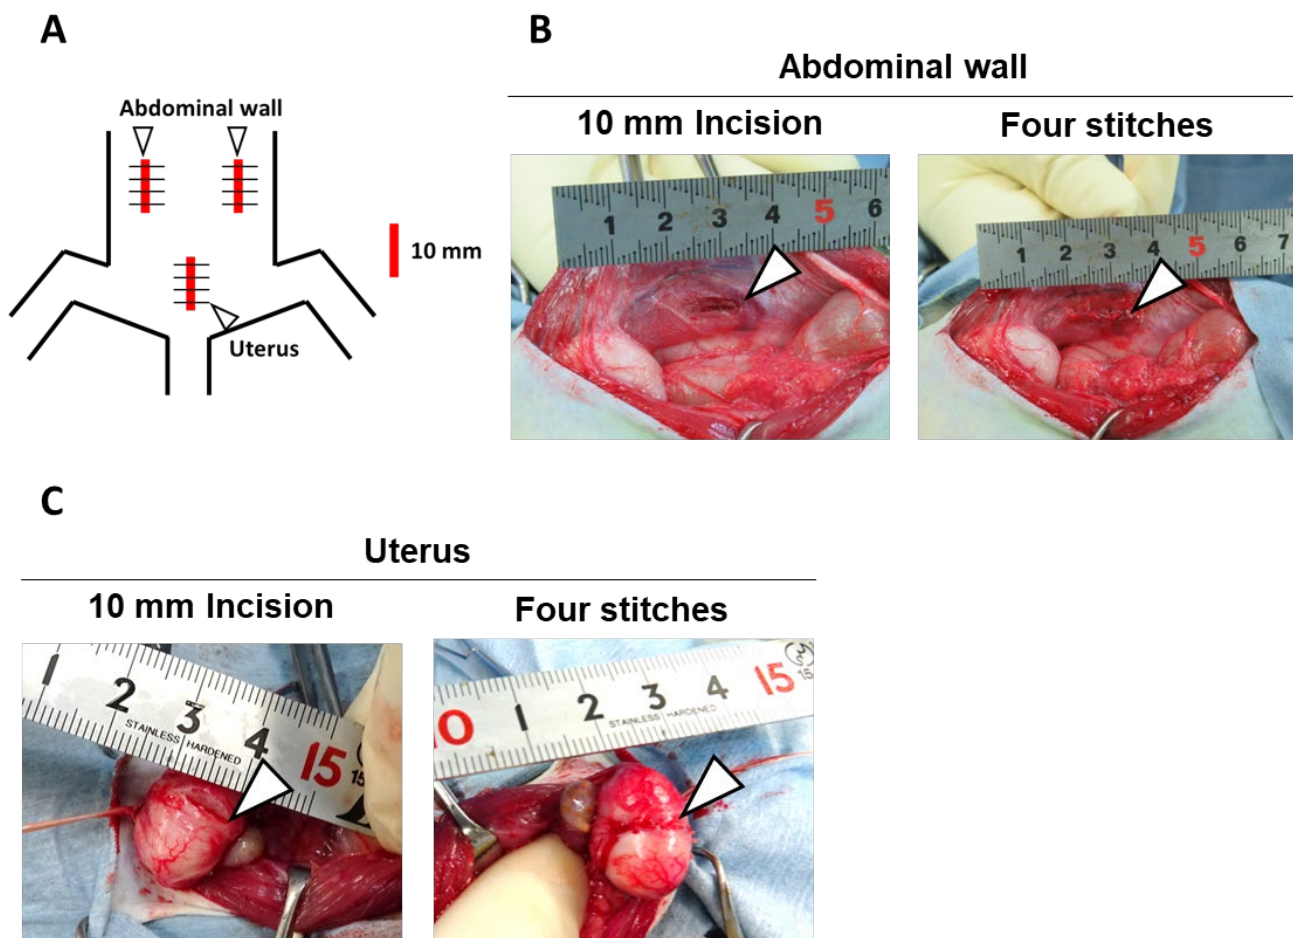

### Supplementary Figure S1

Methods for surgically inducing postoperative adhesions (PA) in cynomolgus monkeys. **(A)** PA were surgically induced at the right and left abdominal walls and uterus in female monkeys. **(B)** Procedures to induce PA in abdominal walls. After a midline incision, abdominal walls about 20 mm from midline were dissected for 10 mm (Left), abraded, and sutured four times (Right). Arrowheads show the injured site. **(C)** The same procedure was also performed at the uterus in the female monkeys. Arrowheads indicate the injured site.

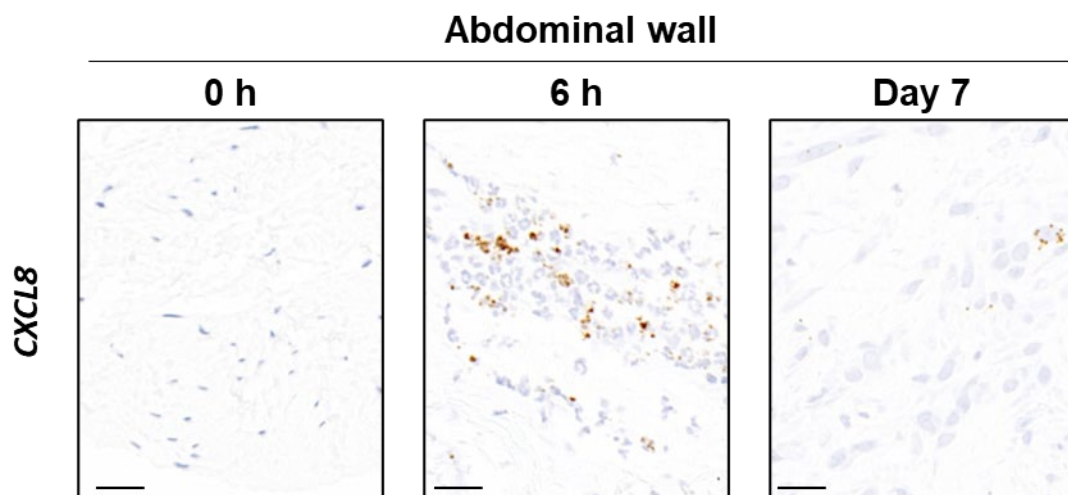

### Supplementary Figure S2

Evaluation of *CXCL8* positive cells in the monkeys following PA induction surgery. Representative images of in situ hybridization staining for *CXCL8*. Scale bars, 20  $\mu$ m.
